# Supplementary material for: Activation of the ubiquitin-proteasome system contributes to oculopharyngeal muscular dystrophy through muscle atrophy
Source: PubMed Central journal article supplement (PMC8791501; doi:10.1371/journal.pgen.1010015), 2022-01-13
Supplement: pgen.1010015.s006.pdf [file pgen.1010015.s006.pdf]

A

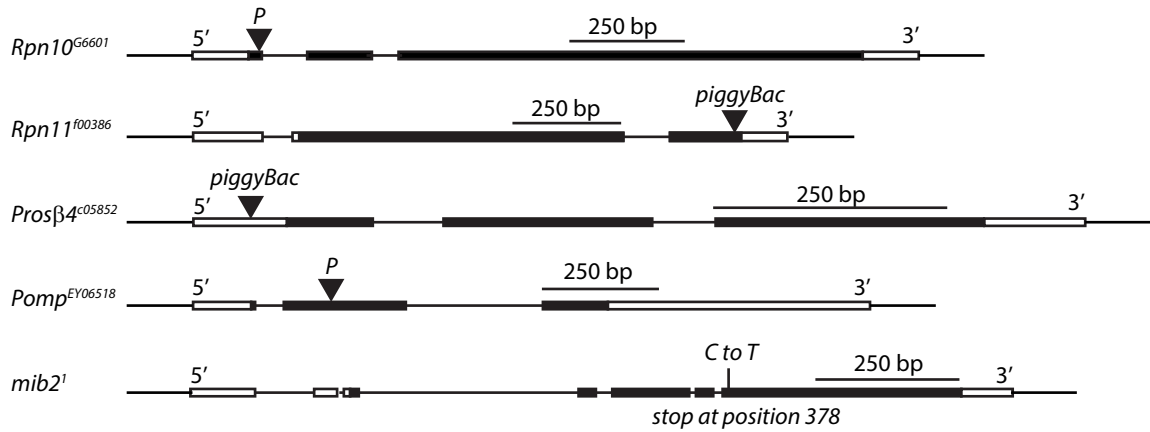

B

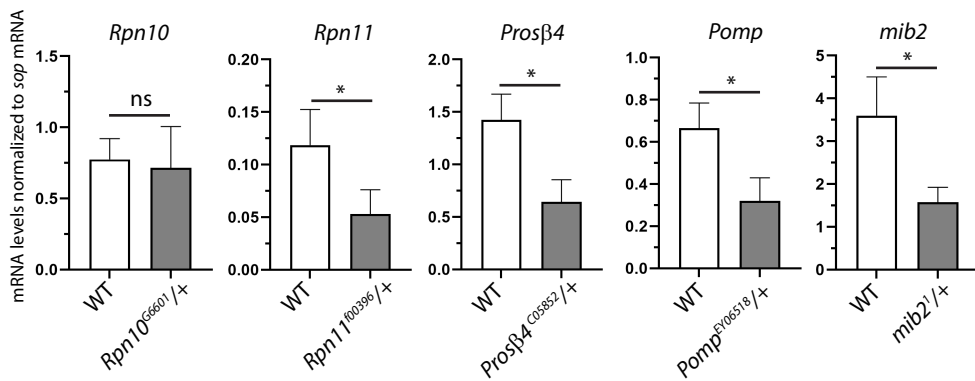

C

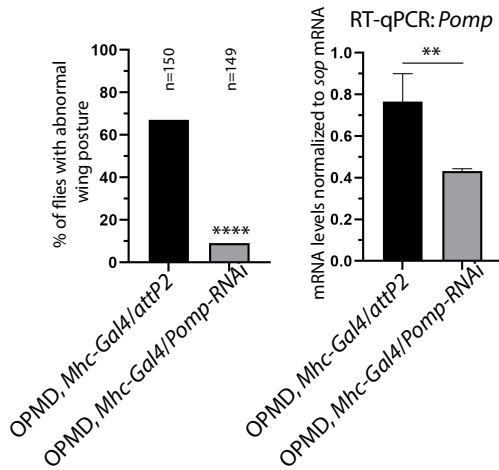

D

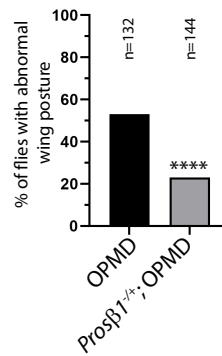

Abbreviations

|                                     |                                                                 |
|-------------------------------------|-----------------------------------------------------------------|
| OPMD, <i>Mhc-Gal4/attP2</i>         | <i>Act88F-PABPN1-17ala, Mhc-Gal4/P{caryP}attP2</i>              |
| OPMD, <i>Mhc-Gal4/Pomp-RNAi</i>     | <i>Act88F-PABPN1-17ala, Mhc-Gal4/Pomp<sup>GLC01750</sup></i>    |
| OPMD                                | <i>Act88F-PABPN1-17ala/+</i>                                    |
| <i>Prosβ1</i> <sup>+/+</sup> ; OPMD | <i>Prosβ1</i> <sup>05070/+</sup> ; <i>Act88F-PABPN1-17ala/+</i> |

Figure S3
