# Supplementary material for: Activation of the ubiquitin-proteasome system contributes to oculopharyngeal muscular dystrophy through muscle atrophy
Source: PubMed Central journal article supplement (PMC8791501; doi:10.1371/journal.pgen.1010015), 2022-01-13
Supplement: pgen.1010015.s007.pdf [file pgen.1010015.s007.pdf]

A

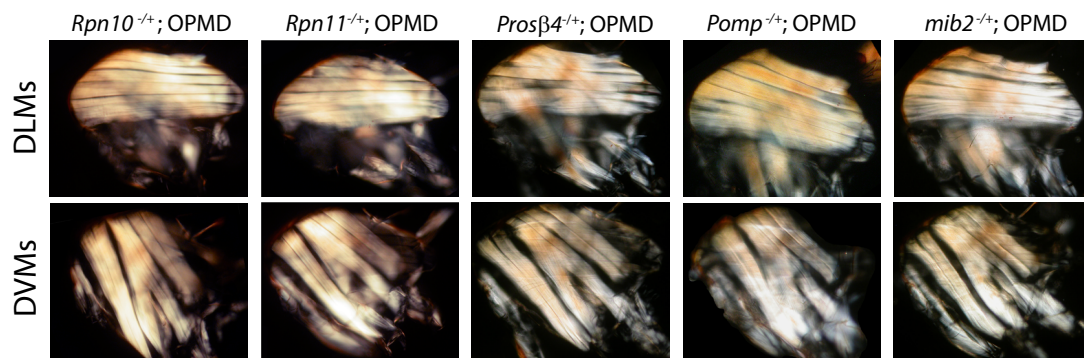

B

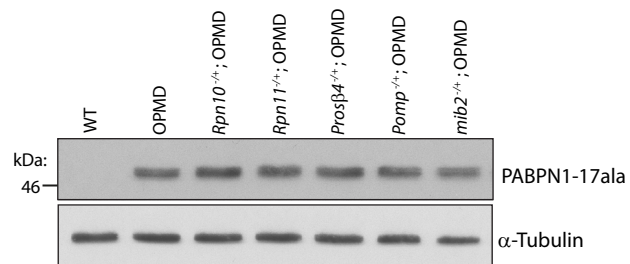

Figure S4
