# Supplementary material for: Activation of the ubiquitin-proteasome system contributes to oculopharyngeal muscular dystrophy through muscle atrophy
Source: PLoS Genet. 2022 Jan 13;18(1):e1010015. doi: 10.1371/journal.pgen.1010015 (PMC8791501; doi:10.1371/journal.pgen.1010015)
Supplement: S3 Table — (XLSX) [file pgen.1010015.s003.xlsx]

## Sheet: Chymotrypsin-like activities
Table S3: Numerical values for Figures 4A, S5B, 5C and 7D.
Chymotrypsin-like activities (Figure 4 and Figure S5)
Figure 4A	Day 3									Day 6
	WT	Act88F-17ala	Act88F-17ala+Rpn10+/-	Act88F-17ala+Rpn11+/-	Act88F-17ala+ProsB4+/-	Act88F-17ala+ Pomp+/-	Act88F-17ala+mib2+/-			WT	Act88F-17ala	Act88F-17ala+Rpn10+/-	Act88F-17ala+Rpn11+/-	Act88F-17ala+ProsB4+/-	Act88F-17ala+ Pomp+/-	Act88F-17ala+mib2+/-
	1111	1500	916	1958	1729	1172	2718			601	992	788	1459	1226	1366	1350
	958	1511	880	2211	1853	1217	2337			602	1135	796	1632	1327	1281	1347
	1022	1515	898	2110	1869	1178	2264			604	1440	890	1658	1517	1406	1607
	905	2267	981	1253	1512	1321	1004			950	1469	660	914	978	734	756
	869	2118	992	1368	1425	1307	975			834	1479	627	828	954	739	755
	835	2067	950	1163	1501	1591	1051			861	1589	575	816	864	823	799
	822	2044	1022	1103	1618	1895	1048			671	1031	597	1390	1091	807	1081
	739	1856	1058	1243	1657	1894	1191			630	1004	662	1465	1265	933	1187
	778	2050	1026	1086	1601	1875	997			612	1033	666	1526	1280	861	1464
	532	1451								636	1097
	541	1643								577	1050
	559	1515								724	952
	835	1127								640	1399
	831	1131								656	1300
	827	1090								656	1405
	905	1570								753	1033
	842	1680								735	1006
	824	1642								753	1080
mean	818.611	1654.28	969.222	1499.44	1640.56	1494.44	1509.44		mean	694.167	1194.11	695.667	1298.67	1166.89	994.444	1149.56
Figure S5B	Day 3									Day 6
	WT	Rpn10+/-	Rpn11+/-	ProsB4+/-	Pomp+/-	mib2+/-				WT	Rpn10+/-	Rpn11+/-	ProsB4+/-	Pomp+/-	mib2+/-
	1111	666	1159	1063	1321	1246				601	461	766	798	861	818
	958	727	1217	977	1440	1135				602	510	843	771	867	872
	1022	694	1225	1030	1303	1245				604	471	775	785	916	808
	905	423	594	748	626	666				950	309	552	569	473	467
	869	421	698	716	606	702				834	312	575	608	463	454
	835	431	634	804	624	616				861	296	599	543	458	462
	822	662	1122	1274	828	954				671	562	622	818	548	519
	739	625	1109	1259	741	858				630	593	629	825	569	571
	778	546	1085	1206	744	839				612	576	605	786	594	618
	532									636
	541									577
	559									724
	835									640
	831									656
	827									656
	905									753
	842									735
	824									753
mean	818.611	577.222	982.556	1008.56	914.778	917.889			mean	694.167	454.444	662.889	722.556	638.778	621

## Sheet: Nuclear aggregates
PABPN1 nuclear aggregates
Figure 5C											Figure 7D
Act88F-17ala	Act88F-17ala+Rpn10+/-	Act88F-17ala+Rpn11+/-		Act88F-17ala	Act88F-17ala+ProsB4+/-	Act88F-17ala+ Pomp+/-	Act88F-17ala+mib2+/-				Act88F-17ala + DMSO	Act88F-17ala + MG132
534	801	574		610	1043	287	654				332	245
613	499	162		184	847	224	713				267	702
259	984	383		494	420	265	1430				411	491
723	1263	559		113	630	314	637				136	661
122	409	460		770	497	256	413				429	278
314	1643	893		394	206	308	327				574	120
305	159	660		128	389	360	475				792	419
496	285	251		366	515	147	583				772	201
222	555	122		251	170	198	922				598	691
341	330	273		606	81	143	675				656	1160
1014	646	220		232	430	146	276				440	433
482	1048	406		387	51	393	132				338	294
149	931	220		584	391	237	295				594	478
123	1427	749		699	874	377	445				253	606
414	606	379		648	726	39	796				681	308
105	326	566		670	502	109	1872				348	903
262	225	98		999	361	636	709				650	730
49	391	236		385	653	372	988				386	608
358	1085	218		320	226	906	625				551	733
163	325	239		421	402	513	383				490	946
401	258	302		662	429	538	362				1236	1199
792	156	515		623	469	495	73				710	1143
187	199	429		229	89	283	281				940	1090
98	75	226		793	572	183	241				593	690
425	333	62		522	691	209	339				899	754
286	297	109		693	120	283	1204				879	237
211	183	301		532	598	96	93				1173	844
100	783	185		401	303	164	79				334	428
598	812	538		428	122	235	215				639	941
303	1285	462		466	212	354	359				281	1036
188	339	1218		857	146	558	417				219	382
286	112	359		270	136	78	183				573	345
122	308	551		685	217	644	436				367	450
135	1016	500		169	316	37	155				928	589
26	517	443		388	576	224	729				490	299
192	604	44		292	244	812	778				676	467
68	314	327		476	164	320	250				632	295
64	219	232		126	142	1127	770				575	498
51	83	376		134	489	1160	705				393	600
308	460	336		313	351	339	986				760	927
101	354	220		969	950	657	197				739	510
449	75	218		582	790	137	410				406	331
207	597	684		371	603	375	670				415	984
53	465	646		149	172	623	466				313	727
154	57	159		756	879	696	479				255	594
947	445	53		498	597	425	801				293	340
294	179	217		337	419	336	660				354	480
657	707	129		796	218	570	898				741	488
894	284	143		797	519	566	394				525	210
136	592	508		745	307	1025	412				178	201
313	431	212		222	91	800	261				468	155
404	504	290		535	770	197	559				560	268
357	296	154		289	261	391	396				598	192
194	164	469		269	1070	171	225				351	281
110	592	415		689	723	108	507				738	229
153	391	415		519	500		473				572	645
117	783	1137		586	801		1111				364	290
377	1072	242		717	160		716				286	100
68	1053	405		583	747		239				1035	238
57	826	509		460	224		700				994	206
167	691	276		759	372		343				1275	705
235	204	591		316	710		554				692	231
857	85	326		655	128		465				799	251
574	259	462		339	471		615				837	147
166	110	246		722	855		369				277	722
244	194	165		675	216		348				68	288
189	75	507		1028	259		755				680	505
341	262	354		351	246		950				1207	215
723	144	366		405	195		421				128	664
39	500	646		960	116		405				493	184
54	910	680		347	32		846				225	418
371	230	841		890	422		833				465	275
352	230	882		649	554		1275				207	363
246	106	737		525	1004		322				847	383
74	605	443		401	303		512				488	258
374	493	496		889	134		94				612	693
1123	48	234		526	417		621				593	585
714	312	507		420	337		1092				792	291
639	482	507		633	388		454				561	217
759	182	797		521	210		360				456	640
705	352	311		645	261		295				389	638
799	541	816		497	571		348				607	816
645	156	646		469	429		175				90	975
503	428	1055		416	1042		569				915	1154
814	882	456		786	722		235				800	605
1020	358	519		993	725		53				282	585
485	240	354		904	856		802				286	914
469	563	806		894	809		513				418	940
887	1074	582		453	746		1106				1682	530
770	592	472		496	759		1063				221	368
580	1203	775		252	1153		696				186	1390
809	853	224		526	328		920				148	519
1171	446	317		344	387		1007				181	306
1015	815	615		248	320		1095				732	232
463	829	476		286	603		899				242	505
1235	1104	1143		670	255		503				453	169
577	529	1342			309		595				424	679
345	951	704			475		443				141	546
279	780	697			458		378				349	445
356	1233				243		918				134	245
723	363				675		896				810	306
999	285				335		1460				573	742
1478	571				304		456				369	660
1579	448				254		893				948	326
1182	604				207		797				147	1153
1481	866				486		914				68	1329
559	540				171		525				102	283
894	1092				592						800	332
471	1219				977						450	626
1671	786				806						597	664
779	436				848						513	377
265	487				1095						865	861
134	451				580						316	1371
220	1340				647						254	1105
710	1423										313	339
	325										348	338
	782										264	401
	280										266	381
	1341										114	671
	1104										333	318
	1021										468	504
	1216										362	403
	513										333	675
	276										350	434
	392										381	424
	535										351	588
	272										603	468
	362										303	89
	1167										182	318
	474										371	222
	1076										205	480
	1974										259	689
	1779										435	701
	1427										405	260
	852										472	308
	959										466	707
	948										660	588
	510										332	95
	855										770	739
	750										230	355
											281	581
											605	383
											606	331
											212	925
											254	448
											226	318
											288	305
											566	144
											1154	602
											338	572
											625	627
											429	376
											282	1005
											623	390
											164	500
											215	306
											291	206
											835	448
											518	920
											431	530
											267	542
											306	526
											1117	394
											707	590
											202	341
											636	172
											488	231
											186	1093
											252	313
											165	159
											162	242
											438	954
											75	938
											1129	537
											602	692
											361	227
											397	394
											420	719
											506	853
											355	999
											842	817
											486	879
											153	851
											251	314
											775	622
											261	630
											229	502
											1007	524
											822	245
											823	198
											762	198
											462	100
											307	696
											435	753
											501	254
											410	1140
											583	1205
											560	1111
											611	484
											360	422
											407	462
											439	639
											417	418
											692	102
											602	635
											163	777
											292	573
											252	878
											368	456
											353	998
											89	416
											161	1186
											1048	915
											433	700
											307	1136
											960	525
											1012	573
											512	388
											249	939
											788	464
												589
												583
												539
												445
												272
												263
												1554
												651
												492
												300
